# Supplementary material
Source: Springer Nature journal article supplement (https://www.springermedizin.de/resource/supplementary/12879_2012_2357_MOESM2_ESM.pdf/9444398)
Supplement: MOESM2 [file 9444398]

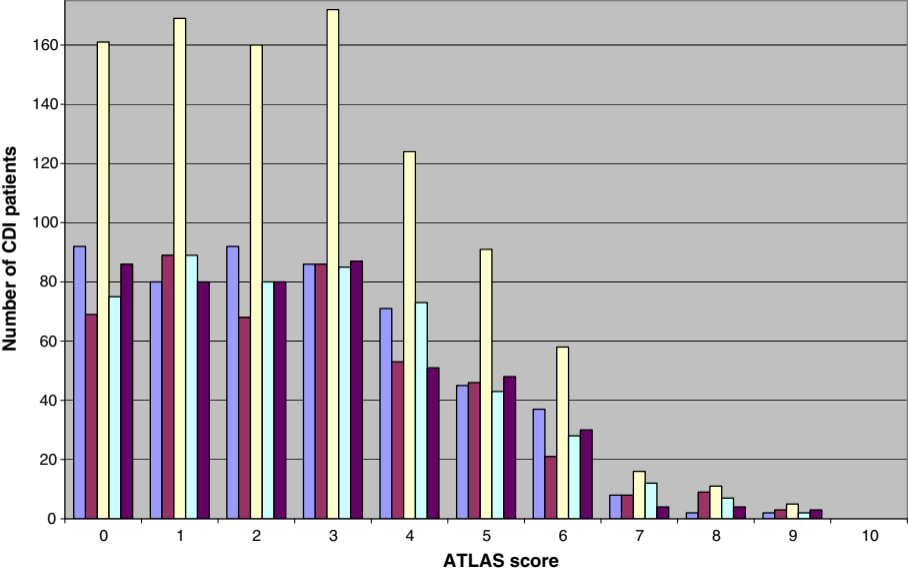

■ 003 study 
 ■ 004 study 
 ■ Combined studies 
 ■ Combined studies - vancomycin only 
 ■ Combined studies - fidaxomicin only
